# Supplementary material for: Genetic characterization and whole-genome sequencing-based genetic analysis of influenza B in Shandong Province during 2015–2024
Source: Research Square preprint supplement (doi:10.21203/rs.3.rs-7470245/v1), 2025-10-28
Supplement: Supplementary file 1 [file df28cf652798ebc5909c0ba2.xlsx]

## Sheet: Sheet1
	Name of IBV strain	Isolate ID
	B/Shandong-Anqiu/55/2016	EPI_ISL_19895540
	B/Shandong-Bincheng/1264/2016	EPI_ISL_19895830
	B/Shandong-Boshan/1224/2016	EPI_ISL_19895912
	B/Shandong-Fushan/318/2016	EPI_ISL_19895959
	B/Shandong-Mudan/1168/2016	EPI_ISL_19895960
	B/Shandong-Rencheng/1308/2016	EPI_ISL_19896034
	B/Shandong-Shibei/1363/2016	EPI_ISL_19896576
	B/Shandong-Shizhong/1305/2016	EPI_ISL_19896577
	B/Shandong-Taishan/1364/2016	EPI_ISL_19896578
	B/Shandong-Zhifu/1220/2016	EPI_ISL_19896579
	B/Shandong-Donggang/1256/2016	EPI_ISL_19896580
	B/Shandong-Dongying/1282/2016	EPI_ISL_19896581
	B/Shandong-Huancui/1348/2016	EPI_ISL_19896582
	B/Shandong-Jiaxiang/318/2016	EPI_ISL_19896583
	B/Shandong-Laishan/33/2016	EPI_ISL_19896584
	B/Shandong-Rencheng/1234/2017	EPI_ISL_19896585
	B/Shandong-Zhangdian/1247/2016	EPI_ISL_19896586
	B/Shandong-Huancui/1162/2018	EPI_ISL_19896587
	B/Shandong-Changqing/319/2019	EPI_ISL_19896588
	B/Shandong-Huancui/1868/2019	EPI_ISL_19896589
	B/Shandong-Huantai/31/2019	EPI_ISL_19896590
	B/Shandong-Decheng/11264/2019	EPI_ISL_19896591
	B/Shandong-Decheng/1164/2020	EPI_ISL_19896592
	B/Shandong-Guangrao/315/2019	EPI_ISL_19896593
	B/Shandong-Huaiyin/175/2020	EPI_ISL_19896594
	B/Shandong-Laiwu/338/2020	EPI_ISL_19896595
	B/Shandong-Mudan/1821/2019	EPI_ISL_19896596
	B/Shandong-Mudan/1845/2019	EPI_ISL_19896597
	B/Shandong-Rencheng/1317/2020	EPI_ISL_19896598
	B/Shandong-Rencheng/1321/2020	EPI_ISL_19896599
	B/Shandong-Rencheng/133/2020	EPI_ISL_19896600
	B/Shandong-Rencheng/134/2020	EPI_ISL_19896601
	B/Shandong-Rencheng/1350/2020	EPI_ISL_19896602
	B/Shandong-Shizhong/121/2020	EPI_ISL_19896603
	B/Shandong-Shizhong/130/2020	EPI_ISL_19896604
	B/Shandong-Shizhong/1874/2019	EPI_ISL_19896605
	B/Shandong-Shizhong/1904/2019	EPI_ISL_19896606
	B/Shandong-Shizhong/1914/2019	EPI_ISL_19896607
	B/Shandong-Tianqiao/3104/2019	EPI_ISL_19896608
	B/Shandong-Tiaoqiao/3103/2019	EPI_ISL_19896609
	B/Shandong-Zhangdian/161/2020	EPI_ISL_19896935
	B/Shandong-Boshan/162/2021	EPI_ISL_19896936
	B/Shandong-Mudan/1217/2021	EPI_ISL_19896937
	B/Shandong-Mudan/1274/2021	EPI_ISL_19896938
	B/Shandong-Mudan/1277/2021	EPI_ISL_19896939
	B/Shandong-Mudan/1290/2021	EPI_ISL_19896940
	B/Shandong-Mudan/1304/2021	EPI_ISL_19896941
	B/Shandong-Mudan/1320/2021	EPI_ISL_19896942
	B/Shandong-Mudan/1329/2021	EPI_ISL_19896943
	B/Shandong-Ningjin/31/2021	EPI_ISL_19896944
	B/Shandong-Ningjin/310/2021	EPI_ISL_19896945
	B/Shandong-Ningjin/311/2021	EPI_ISL_19896946
	B/Shandong-Ningjin/32/2021	EPI_ISL_19896947
	B/Shandong-Ningjin/33/2021	EPI_ISL_19896948
	B/Shandong-Tianqiao/174/2021	EPI_ISL_19896949
	B/Shandong-Tianqiao/179/2021	EPI_ISL_19896950
	B/Shandong-Decheng/1465/2016	EPI_ISL_19897071
	B/Shandong-Decheng/1518/2015	EPI_ISL_19897075
	B/Shandong-Fushan/1276/2015	EPI_ISL_19897077
	B/Shandong-Huaiyin/1257/2015	EPI_ISL_19897080
	B/Shandong-Taishan/1883/2015	EPI_ISL_19897084
	B/Shandong-Zhifu/1162/2016	EPI_ISL_19897089
	B/Shandong-Bincheng/138/2018	EPI_ISL_19897093
	B/Shandong-Bincheng/3228/2017	EPI_ISL_19897095
	B/Shandong-Boshan/153/2018	EPI_ISL_19897104
	B/Shandong-Decheng/1116/2018	EPI_ISL_19897105
	B/Shandong-Decheng/11351/2017	EPI_ISL_19897106
	B/Shandong-Dongchangfu/1712/2017	EPI_ISL_19897107
	B/Shandong-Donggang/189/2018	EPI_ISL_19897108
	B/Shandong-Donggang/1688/2017	EPI_ISL_19897109
	B/Shandong-Dongying/1661/2017	EPI_ISL_19897365
	B/Shandong-Gangcheng/1265/2018	EPI_ISL_19897413
	B/Shandong-Gangcheng/1619/2017	EPI_ISL_19897415
	B/Shandong-Huaiyin/310/2017	EPI_ISL_19897416
	B/Shandong-Huancui/1691/2017	EPI_ISL_19897417
	B/Shandong-Licheng/34/2017	EPI_ISL_19897418
	B/Shandong-Mudan/1186/2018	EPI_ISL_19897481
	B/Shandong-Mudan/330/2017	EPI_ISL_19897483
	B/Shandong-Rencheng/11122/2017	EPI_ISL_19897484
	B/Shandong-Rencheng/11270/2017	EPI_ISL_19897486
	B/Shandong-Shibei/11199/2017	EPI_ISL_19897488
	B/Shandong-Shizhong/1124/2018	EPI_ISL_19897503
	B/Shandong-Shizhong/1909/2017	EPI_ISL_19897505
	B/Shandong-Zhangdian/1555/2017	EPI_ISL_19897506
	B/Shandong-Zhifu/1485/2017	EPI_ISL_19897507
	B/Shandong-Zhifu/1522/2017	EPI_ISL_19897508
	B/Shandong-Zhifu/168/2018	EPI_ISL_19897509
	B/Shandong-Zichuan/323/2017	EPI_ISL_19897510
	B/Shandong-Zhifu/1411/2017	EPI_ISL_19897512
	B/Shandong-Tianqiao/137/2022	EPI_ISL_19897548
	B/Shandong-Shibei/194/2022	EPI_ISL_19897549
	B/Shandong-Zichuan/312/2021	EPI_ISL_19897550
	B/Shandong-Dongying/149/2022	EPI_ISL_19897551
	B/Shandong-Zhifu/118/2022	EPI_ISL_19897552
	B/Shandong-Kuiwen/1638/2021	EPI_ISL_19897553
	B/Shandong-Rencheng/11483/2021	EPI_ISL_19897554
	B/Shandong-Daiyue/1600/2021	EPI_ISL_19897555
	B/Shandong-Huancui/133/2022	EPI_ISL_19897556
	B/Shandong-Tianqiao/1977/2023	EPI_ISL_19897557
	B/Shandong-Huaiyin/170/2024	EPI_ISL_19897558
	B/Shandong-Laiwu/1690/2024	EPI_ISL_19897559
	B/Shandong-Jiaozhou/11175/2023	EPI_ISL_19897560
	B/Shandong-Zhangdian/140/2024	EPI_ISL_19897561
	B/Shandong-Shizhong/171/2024	EPI_ISL_19897562
	B/Shandong-Dongying/184/2024	EPI_ISL_19897563
	B/Shandong-Lanshan/190/2024	EPI_ISL_19897564
	B/Shandong-Rencheng/1256/2024	EPI_ISL_19897565
	B/Shandong-Shibei/12366/2023	EPI_ISL_19897566
	B/Shandong-Shizhong/11657/2021	EPI_ISL_19897567
